# Supplementary material for: Structural phases in Ca 2+ -triggered alginate assembly and gelation: circular dichroism-guided multimodal analysis
Source: Royal Society of Chemistry journal article supplement (doi:10.1039/d5sm00758e), 2026-01-01
Supplement: d5sm00758e1.pdf [file d5sm00758e1.pdf]

## Structural Phases in Ca<sup>2+</sup>-Triggered Alginate Assembly and Gelation: Circular Dichroism-Guided Multimodal Analysis

Tatsuki Haga,<sup>a†</sup> Satoshi Hashimoto,<sup>a†</sup> Masaya Yoshida,<sup>b,c</sup> Yudai Ono,<sup>d</sup> Takeharu Haino,<sup>b,d</sup> Yasuyuki Maki,<sup>e</sup> Koichi Matsuo,<sup>a,d,f,g,\*‡</sup> Mohamed I.A. Ibrahim<sup>f,h,\*‡</sup>

<sup>a</sup>Graduate School of Advanced Science and Engineering, Hiroshima University, Higashi-Hiroshima 739-8526, Japan.

<sup>b</sup>Department of Chemistry, Graduate School of Advanced Science and Engineering, Hiroshima University, Higashi-Hiroshima 739-8526, Japan.

<sup>c</sup>Department of Molecular and Macromolecular Chemistry, Graduate School of Engineering, Nagoya University, Nagoya 464-8603, Japan.

<sup>d</sup>International Institute for Sustainability with Knotted Chiral Meta Matter (WPI-SKCM<sup>2</sup>), Hiroshima University, Higashi-Hiroshima 739-8526, Japan.

<sup>e</sup>Faculty of Science, Kyushu University, Fukuoka 819-0395, Japan

<sup>f</sup>Research Institute for Synchrotron Radiation Science, HiSOR, Hiroshima University, Higashi-Hiroshima 739-0046, Japan.

<sup>g</sup>Research Institute for Semiconductor Engineering, Hiroshima University, Higashi-Hiroshima 739-8527, Japan.

<sup>h</sup>National Institute of Oceanography and Fisheries (NIOF), Cairo, Egypt.

† Authors contributed equally to this work.

‡ Authors share equal corresponding authorship.

### Corresponding authors

**Mohamed I. A. Ibrahim:** Affiliation 1: Research Institute for Synchrotron Radiation Science, HiSOR, Hiroshima University, 2-313 Kagamiyama, Higashi-Hiroshima 739-0046, Japan.

Affiliation 2: Marine Chemistry Lab., National Institute of Oceanography and Fisheries (NIOF), Qait Bay, Al Anfoushy, Egypt.

E-mails: [ibra2020@hiroshima-u.ac.jp](mailto:ibra2020@hiroshima-u.ac.jp); [ibrahimmohamed2030@gmail.com](mailto:ibrahimmohamed2030@gmail.com);  
[m.ibrahim@niof.sci.eg](mailto:m.ibrahim@niof.sci.eg)

Orcid: 0000-0001-6190-5899

**Koichi Matsuo:** Affiliation 1: Research Institute for Synchrotron Radiation Science, HiSOR, Hiroshima University, 2-313 Kagamiyama, Higashi-Hiroshima 739-0046, Japan.

Affiliation 2: Graduate School of Advanced Science and Engineering, Hiroshima University, 1-3-2 Kagamiyama, Higashi-Hiroshima 739-8526, Japan.

Affiliation 3: International Institute for Sustainability with Knotted Chiral Meta Matter (WPI-SKCM<sup>2</sup>), Hiroshima University, 1-3-1 Kagamiyama, Higashi-Hiroshima 739-8526, Japan.

Affiliation 4: Research Institute for Semiconductor Engineering, Hiroshima University, 1-3-2 Kagamiyama, Higashi-Hiroshima 739-8527, Japan.

E-mail: [pika@hiroshima-u.ac.jp](mailto:pika@hiroshima-u.ac.jp)

Orcid: 0000-0001-8166-544X

**Table S1.** Transition points of  $\text{Ca}^{2+}$  (mM) as a function of SA concentrations based on CD measurements.

| [SA] (mg/mL) | Position                 |        | Intensity |        | Average [Ca <sup>2+</sup> ]<br>(mM) |
|--------------|--------------------------|--------|-----------|--------|-------------------------------------|
|              | [Ca <sup>2+</sup> ] (mM) |        |           |        |                                     |
|              | Peak                     | Trough | Peak      | Trough |                                     |
| 1.0          | 1.99                     | 2.22   | 1.57      | 2.03   | 1.95 ± 0.27                         |
| 1.2          | 1.82                     | 2.35   | 1.38      | 1.52   | 1.77 ± 0.43                         |
| 1.4          | 2.59                     | 1.84   | 0.82      | 1.10   | 1.59 ± 0.79                         |
| 1.6          | 2.40                     | 1.88   | 1.86      | 2.25   | 2.10 ± 0.27                         |
| 1.8          | 3.19                     | 2.38   | 1.94      | 2.70   | 2.55 ± 0.53                         |
| 2.0          | 3.15                     | 2.48   | 1.96      | 2.75   | 2.59 ± 0.50                         |
| 4.0          | 4.28                     | 4.62   | 3.76      | 4.65   | 4.33 ± 0.41                         |
| 6.0          | *NC                      | 5.30   | 4.69      | 5.21   | 5.07 ± 0.33                         |

\*NC: not included in the calculation

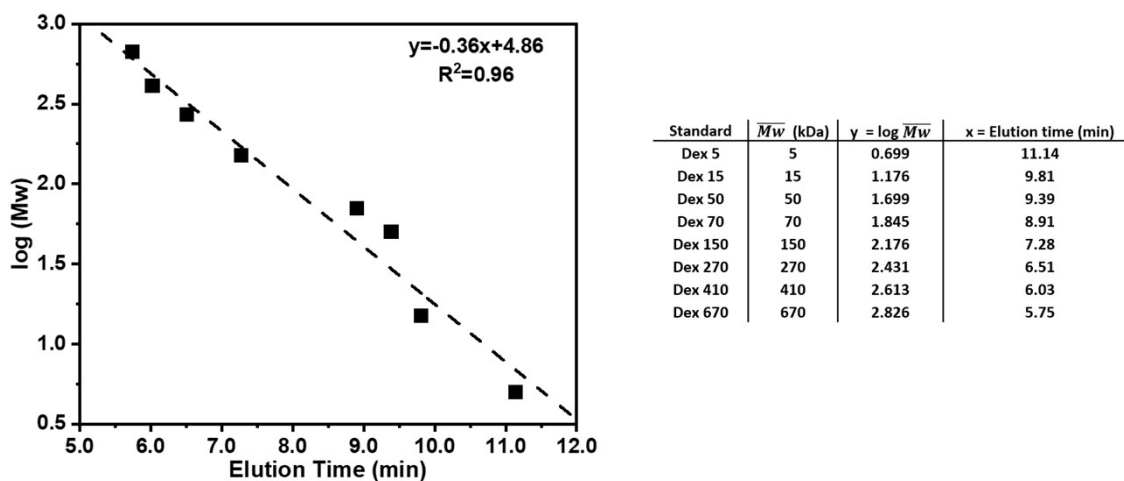

**Fig. S1.** Calibration curve constructed using dextran standards at molecular weights ( $\overline{M}_w$ ) of 5, 15, 50, 70, 150, 270, 410, and 670 kDa, showing the relationship between elution time (min) and  $\log \overline{M}_w$  as determined by HPLC.

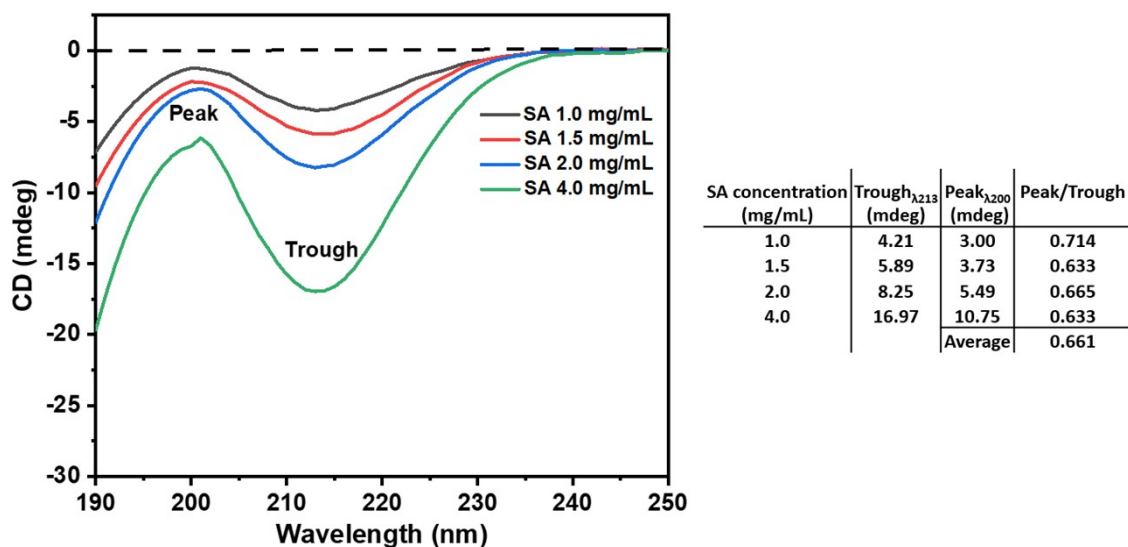

**Fig. S2.** CD spectra of SA at concentrations of 1.0, 1.5, 2.0, and 4.0 mg/mL, showing the changes in ellipticity intensity (mdeg) as a function of SA concentration.

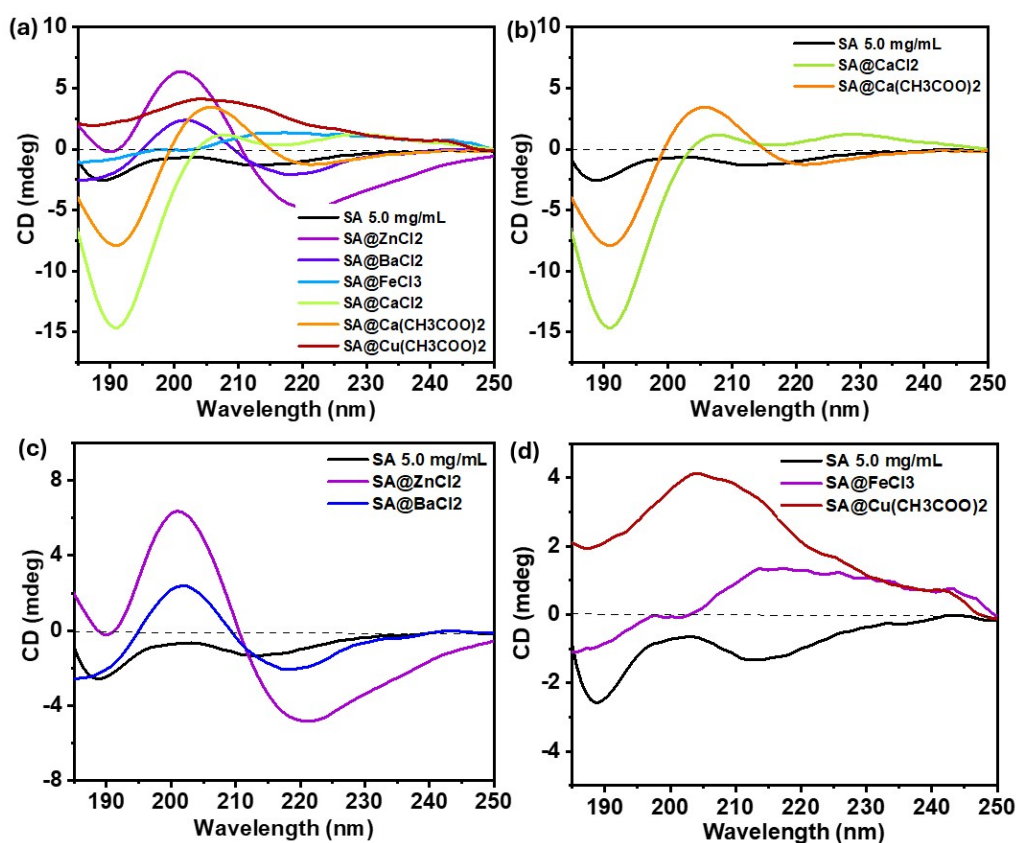

**Fig. S3.** CD spectra of ion-cross-linked hydrogels of SA using VUVCD at HiSOR, BL12, Japan. (a)  $[SA] = 5.0$  mg/mL,  $[ion] = 50$  mM; (b) SA- $Ca^{2+}$  hydrogels; (c) SA- $Ba^{2+}$  and SA- $Zn^{2+}$  hydrogels; (d) SA- $Cu^{2+}$  and SA- $Fe^{3+}$  hydrogels.

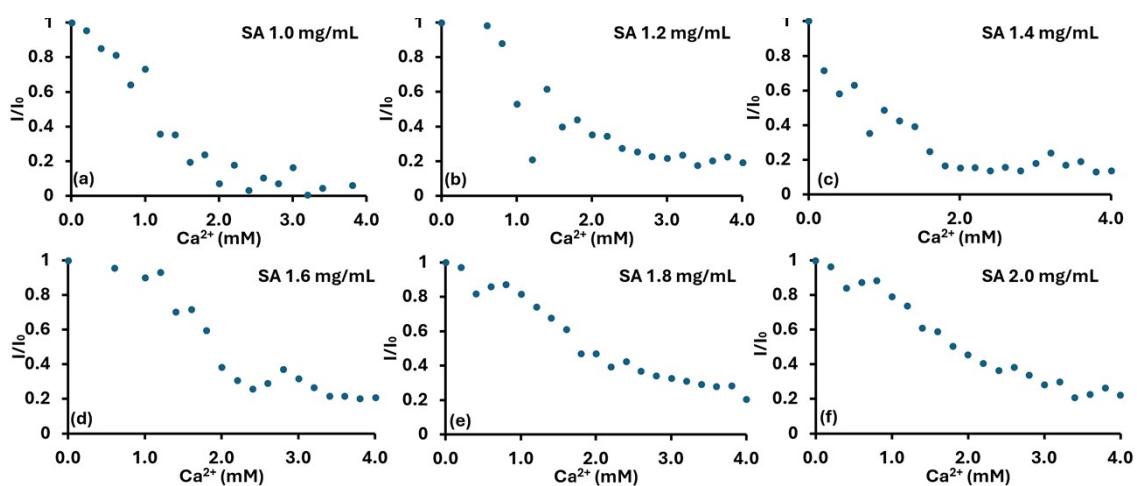

**Fig. S4.** Plots showing the  $\frac{I}{I_0}$  ratios of the ellipticity (trough intensities) as a function of  $\text{Ca}^{2+}$  concentration (0–4.0 mM) for SA solutions in the 1.0–2.0 mg/mL range. Here,  $I_0$  represents the ellipticity in the absence of  $\text{Ca}^{2+}$ , and  $I$  represents the ellipticity at each  $\text{Ca}^{2+}$  concentration.

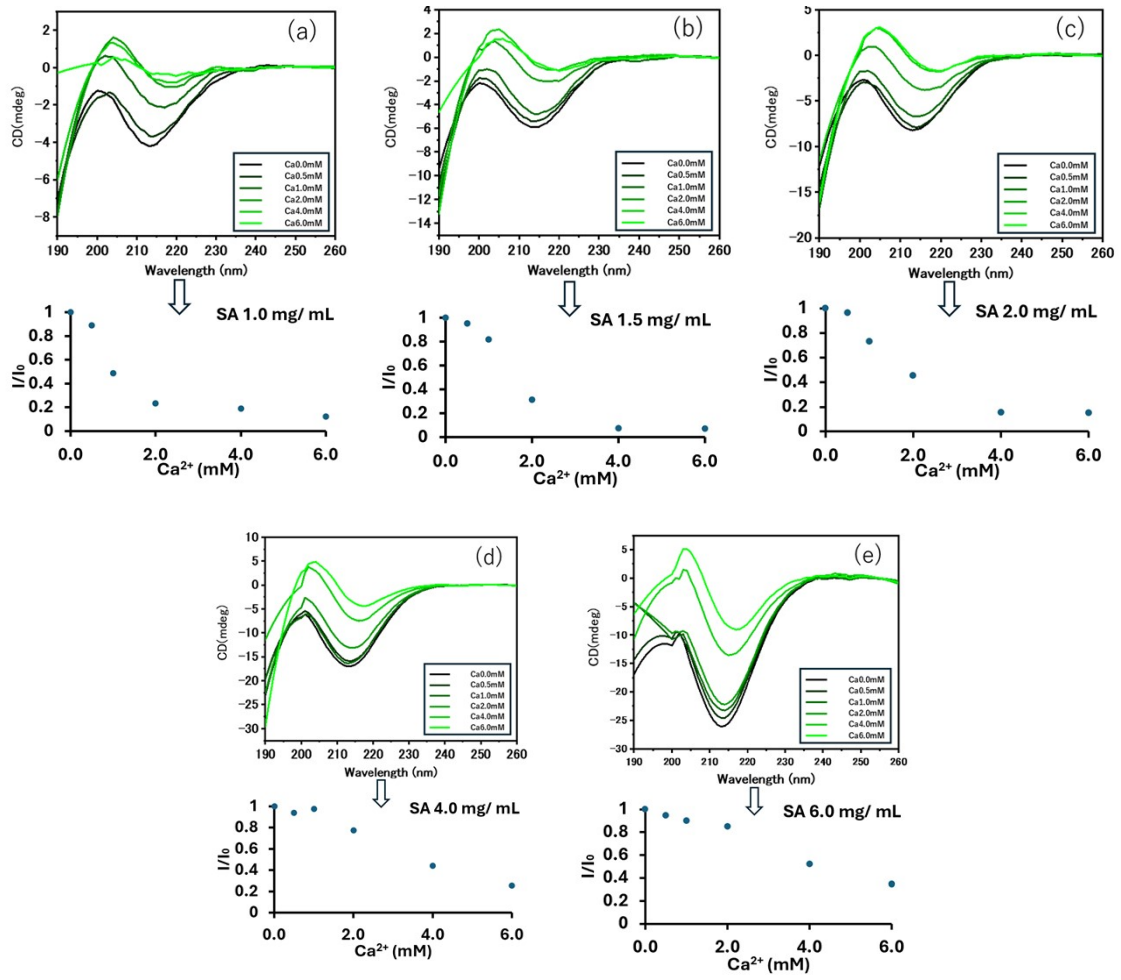

**Fig. S5.** CD spectra of SA- $\text{Ca}^{2+}$  samples in the non-gel phase and the corresponding plots of the  $I/I_0$  ratios of the ellipticity (trough intensities) as a function of  $\text{Ca}^{2+}$  concentration (0–6.0 mM), measured using a conventional CD spectropolarimeter for SA concentrations of (a) 1.0 mg/mL, (b) 1.5 mg/mL, (c) 2.0 mg/mL, (d) 4.0 mg/mL, and (e) 6.0 mg/mL. Here,  $I_0$  represents the ellipticity in the absence of  $\text{Ca}^{2+}$ , and  $I$  represents the ellipticity at each  $\text{Ca}^{2+}$  concentration.

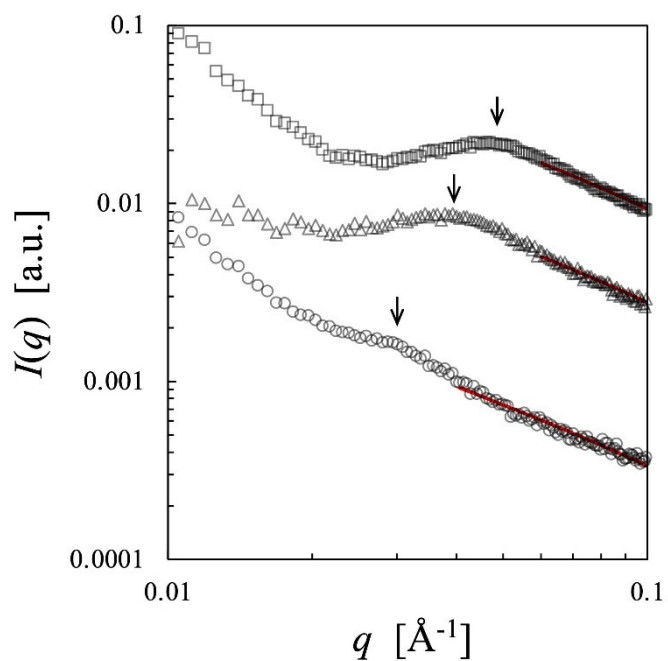

**Fig. S6.** Scattering profiles of SA solutions with no added salt. The concentrations of SA are 2.0 mg/mL (circles), 4.0 mg/mL (triangles), and 6.0 mg/mL (squares), respectively. The curves are vertically shifted for better visualization. The peak positions are indicated by arrows. The solid curves are calculated with **Equation 3**.

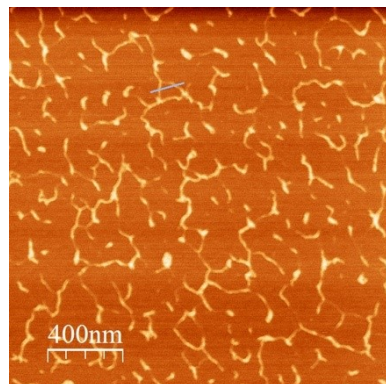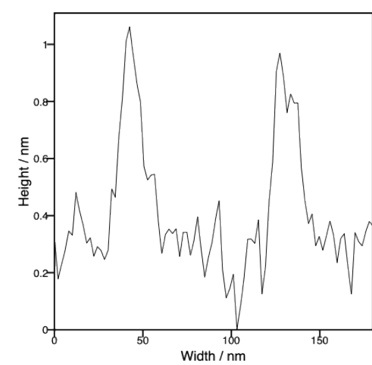

(a) SA1.0 mg/mL and  $\text{Ca}^{2+}$  0 mM

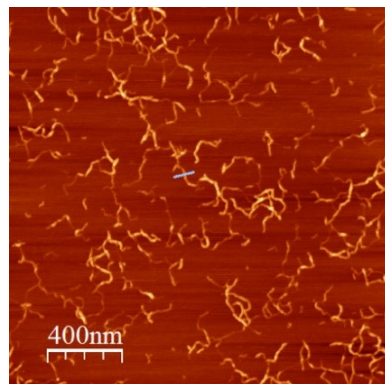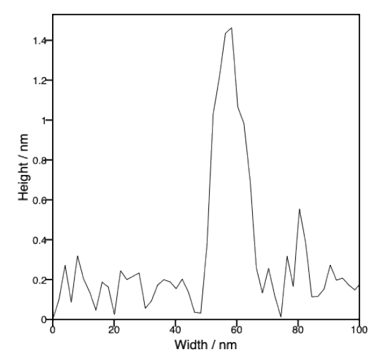

(b) SA1.0 /  $\text{Ca}^{2+}$  1.5 mM

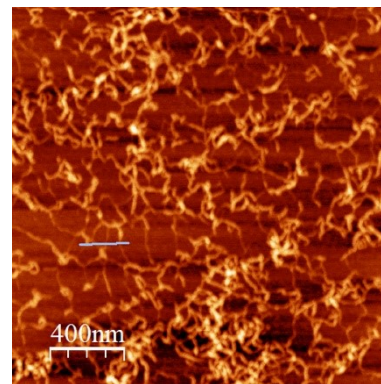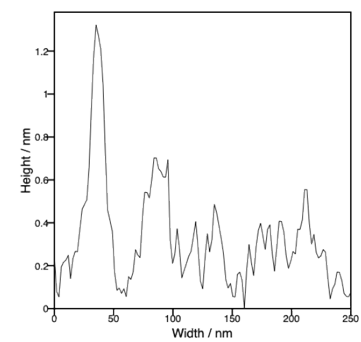

(c) SA1.0 /  $\text{Ca}^{2+}$  1.7 mM

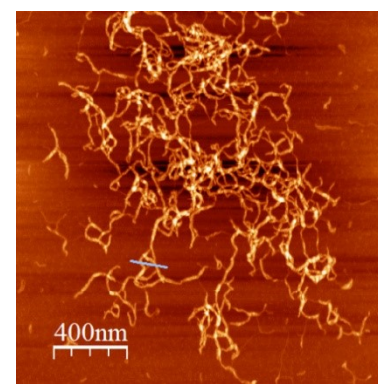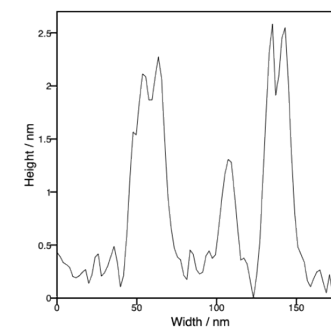

(d) SA1.0 /  $\text{Ca}^{2+}$  2.5 mM



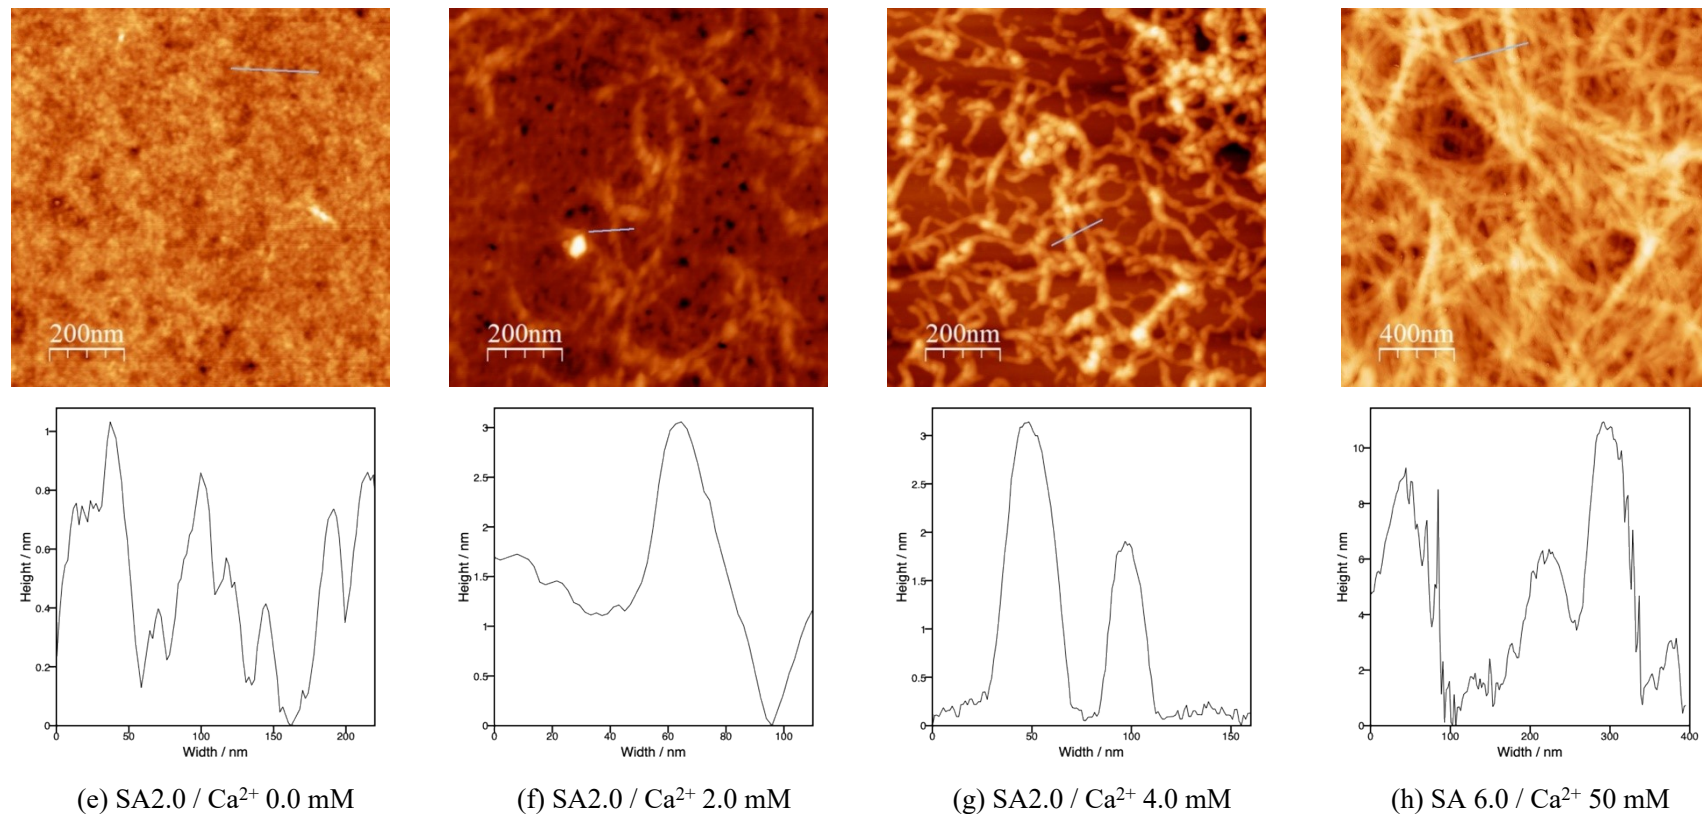

**Fig. S7.** Height profiles correspond to the AFM images of SA at 1.0 mg/mL and 2.0 mg/mL under varying  $\text{Ca}^{2+}$  concentrations. Panels (a, e) represent the initial state at 0 mM  $\text{Ca}^{2+}$ , (b, c, f) correspond to the nucleation phase, (d, g) show the intermediate phase, and (h) represents the gel state.
